# Supplementary material for: Assessment of Extreme Risk Protection Order Use in California From 2016 to 2019
Source: PubMed Central journal article supplement (PMC7303810; doi:10.1001/jamanetworkopen.2020.7735), 2020-06-18
Supplement: jamanetwopen-3-e207735-s001.pdf [file jamanetwopen-3-e207735-s001.pdf]

## Supplementary Online Content

Pallin R, Schleimer JP, Pear VA, Wintemute GJ. Assessment of extreme risk protection order use in California from 2016 to 2019. *JAMA Netw Open*. 2020;3(6):e207735. doi:10.1001/jamanetworkopen.2020.7735

**eTable 1.** Variables Available in the California Restraining and Protective Order System (CARPOS), 2016-2019

**eTable 2.** Rates of Gun Violence Restraining Order (GVRO) Respondents per 100 000 Residents in California Counties, 2016-2019

This supplementary material has been provided by the authors to give readers additional information about their work.

**eTable 1. Variables Available in the California Restraining and Protective Order System (CARPOS), 2016-2019**

|                                                                                   |
|-----------------------------------------------------------------------------------|
| Respondent name                                                                   |
| Petitioner name                                                                   |
| Additional respondent personal identifiers (FBI no., CII no., driver license no.) |
| Respondent date of birth                                                          |
| Respondent gender                                                                 |
| Respondent race                                                                   |
| Respondent height                                                                 |
| Respondent weight                                                                 |
| Respondent hair color                                                             |
| Respondent eye color                                                              |
| Order issue date                                                                  |
| Order expiration date                                                             |
| Order type                                                                        |
| Petitioner relationship to respondent (law enforcement or family)                 |
| Name of law enforcement agency (if law enforcement petitioned for the order)      |
| Law enforcement agency identification number (ORI)                                |
| Agency case number(s)                                                             |
| Court case number                                                                 |
| Court code                                                                        |
| Respondent present in court (yes/no)                                              |
| Respondent's current city                                                         |
| Respondent's current zip code                                                     |
| Name of person who served order                                                   |
| Service date                                                                      |
| Service time                                                                      |
| Agent ID (if law enforcement served the order)                                    |
| Name of service agency (if law enforcement served the order)                      |
| Serving law enforcement agency identification number (ORI)                        |
| Record status at time of record retrieval (i.e., active, suspense, or history)    |

**eTable 2. Rates of Gun Violence Restraining Order Respondents per 100 000 Residents in California Counties, 2016-2019**

| <b>County</b>  | <b>Respondents per 100 000</b> |
|----------------|--------------------------------|
| Colusa         | 0.00                           |
| Lassen         | 0.00                           |
| Yuba           | 0.00                           |
| Del Norte      | 0.00                           |
| Mono           | 0.00                           |
| Modoc          | 0.00                           |
| Shasta         | 0.00                           |
| Imperial       | 0.00                           |
| Alpine         | 0.00                           |
| Siskiyou       | 0.00                           |
| Sutter         | 0.00                           |
| Mariposa       | 0.00                           |
| Sierra         | 0.00                           |
| Plumas         | 0.00                           |
| Tulare         | 0.05                           |
| El Dorado      | 0.13                           |
| Fresno         | 0.15                           |
| Madera         | 0.16                           |
| San Francisco  | 0.17                           |
| Humboldt       | 0.18                           |
| Merced         | 0.18                           |
| Kern           | 0.22                           |
| Los Angeles    | 0.23                           |
| Monterey       | 0.23                           |
| Alameda        | 0.26                           |
| Contra Costa   | 0.26                           |
| Stanislaus     | 0.27                           |
| Sonoma         | 0.30                           |
| Butte          | 0.33                           |
| San Mateo      | 0.39                           |
| Tehama         | 0.39                           |
| San Benito     | 0.41                           |
| San Bernardino | 0.44                           |
| Riverside      | 0.45                           |
| Yolo           | 0.46                           |

|                 |      |
|-----------------|------|
| Kings           | 0.50 |
| Nevada          | 0.50 |
| Napa            | 0.54 |
| Calaveras       | 0.55 |
| Placer          | 0.58 |
| San Joaquin     | 0.67 |
| Orange          | 0.69 |
| Sacramento      | 0.74 |
| San Luis Obispo | 0.79 |
| Mendocino       | 0.86 |
| Ventura         | 0.97 |
| Solano          | 1.07 |
| Santa Clara     | 1.14 |
| Marin           | 1.15 |
| Inyo            | 1.39 |
| Glenn           | 1.79 |
| Tuolumne        | 1.84 |
| Lake            | 1.95 |
| Trinity         | 1.98 |
| Amador          | 2.58 |
| San Diego       | 2.66 |
| Santa Barbara   | 3.36 |
| Santa Cruz      | 4.01 |

Moran's I = -0.03, p-value = 0.49.

Note: Respondents are assigned to the county in which their last order was issued.
